# Supplementary material for: Revisiting the role of phospholipases C in virulence and the lifecycle of Mycobacterium tuberculosis
Source: PubMed Central journal article supplement (PMC4658479; doi:10.1038/srep16918), 2015-11-25
Supplement: srep16918-s1.pdf [file srep16918-s1.pdf]

## **Supplementary Information:**

### **Revisiting the role of phospholipases C in virulence and the lifecycle of *Mycobacterium tuberculosis***

Fabien Le Chevalier, Alessandro Cascioferro, Wafa Frigui, Alexandre Pawlik, Eva C. Boritsch, Daria Bottai, Laleh Majlessi, Jean Louis Herrmann, and Roland Brosch

**Supplementary Figure 1: Capacity of different mycobacterial strains at inducing phagosomal rupture (Gating Strategy)**

(after Simeone et al., PLoS Pathogens, 2015)

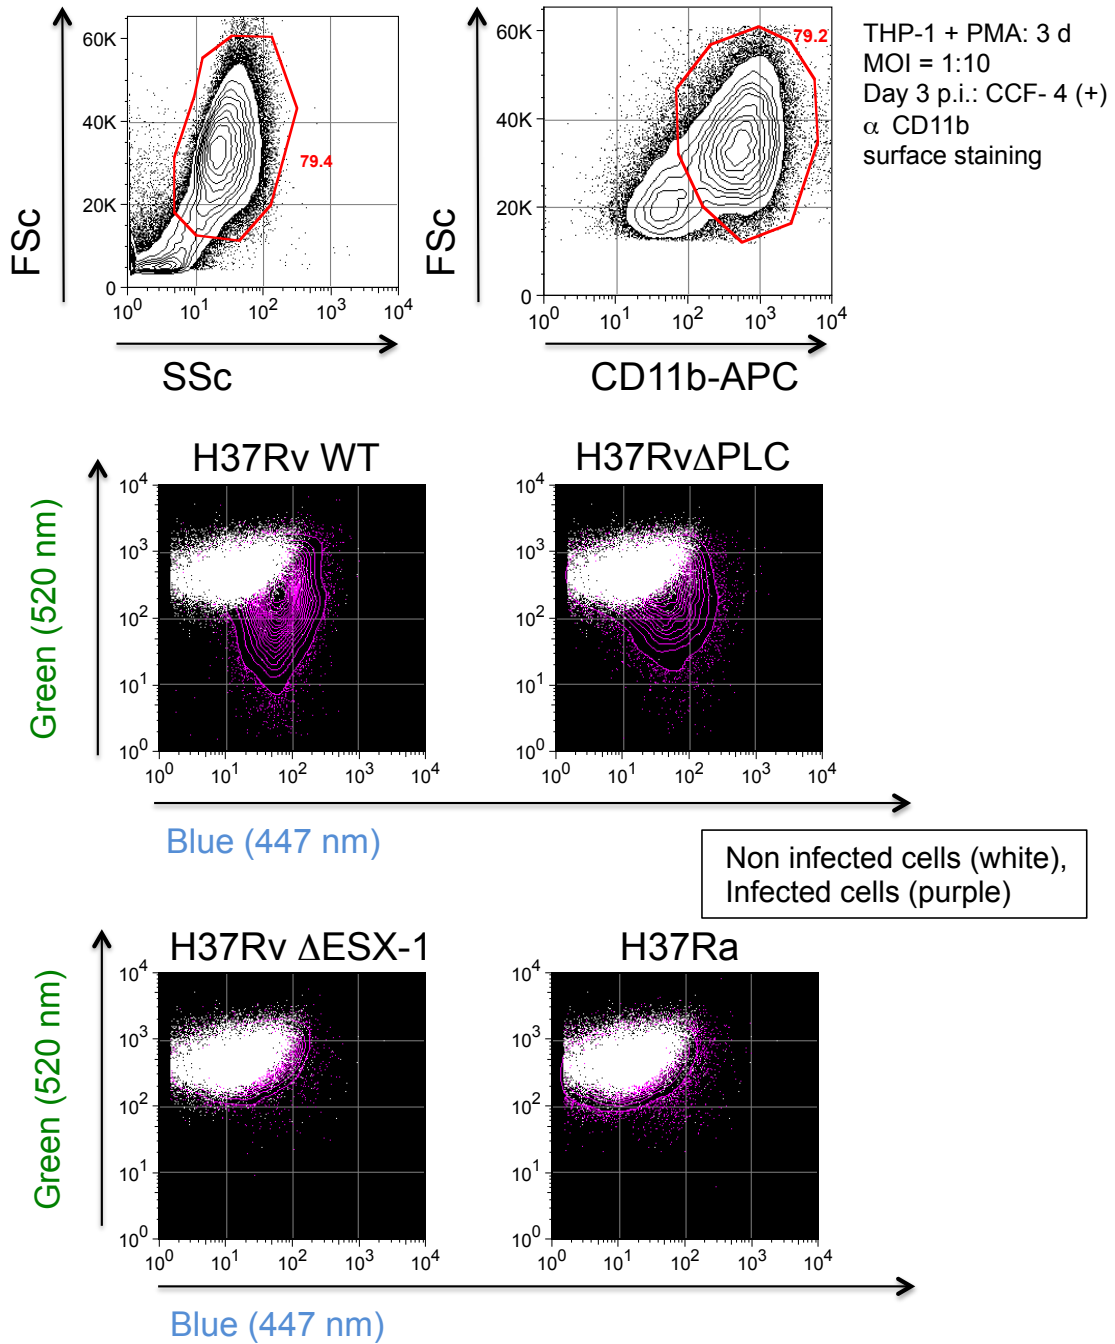

*M. tuberculosis*  
H37Rv WT

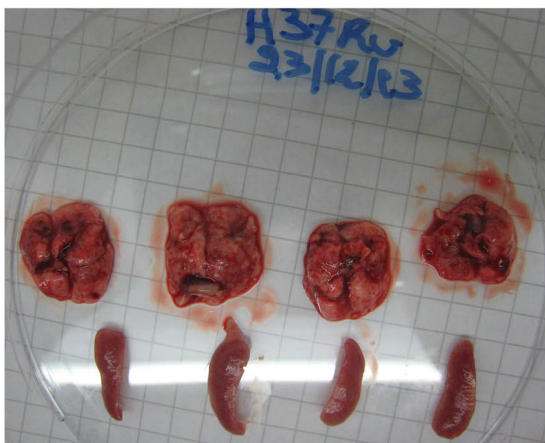

*M. tuberculosis*  
MT103 WT

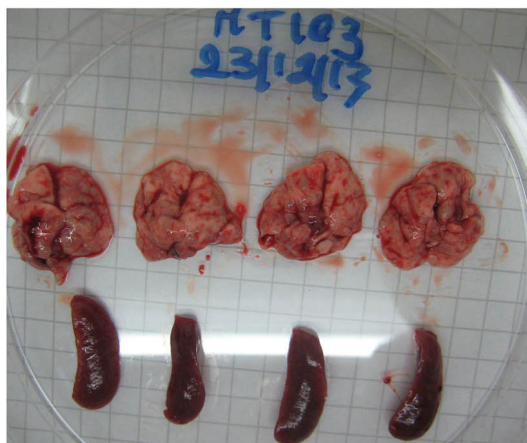

*M. tuberculosis*  
H37Rv $\Delta$ PLC

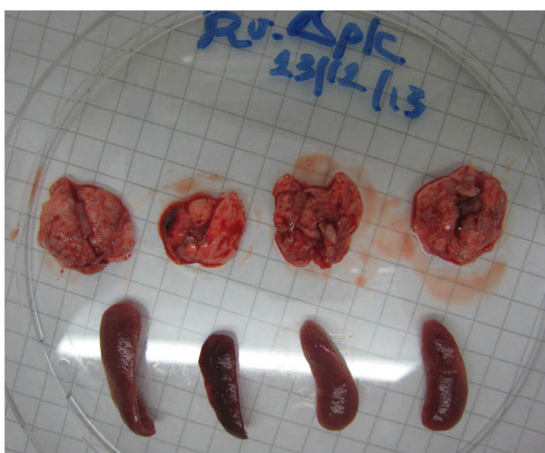

*M. tuberculosis*  
MT103 $\Delta$ PLC

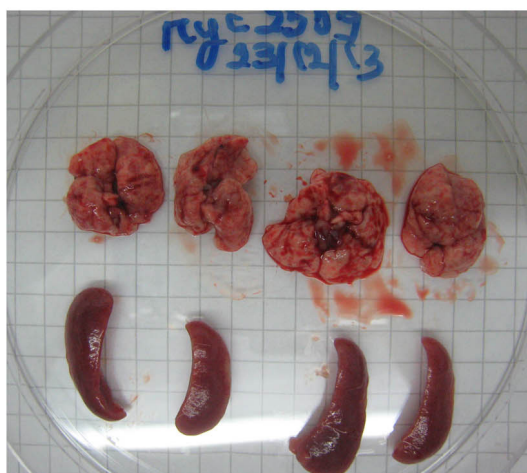

**Supplementary Figure 2:** Lungs and spleens from SCID mice 3 weeks after intravenous infection with the different *M. tuberculosis* strains, indicated.

*M. tuberculosis*  
H37Rv WT

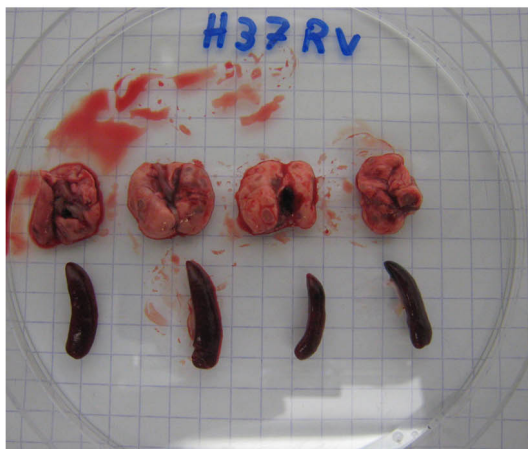

*M. tuberculosis*  
MT103 WT

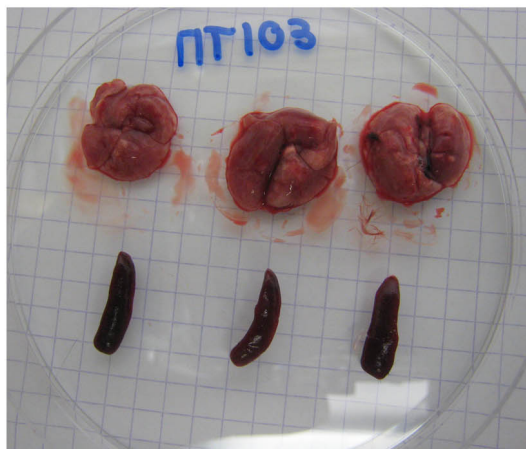

*M. tuberculosis*  
H37Rv $\Delta$ PLC

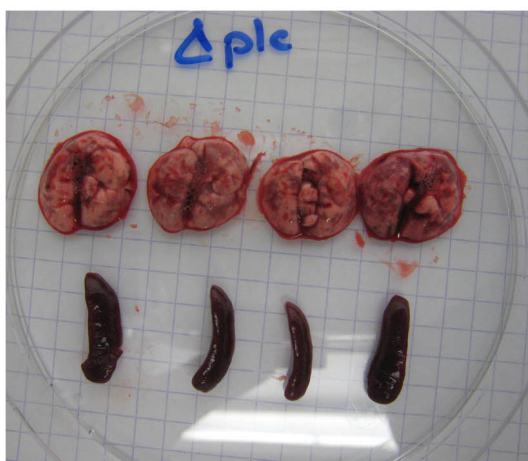

*M. tuberculosis*  
MT103 $\Delta$ PLC

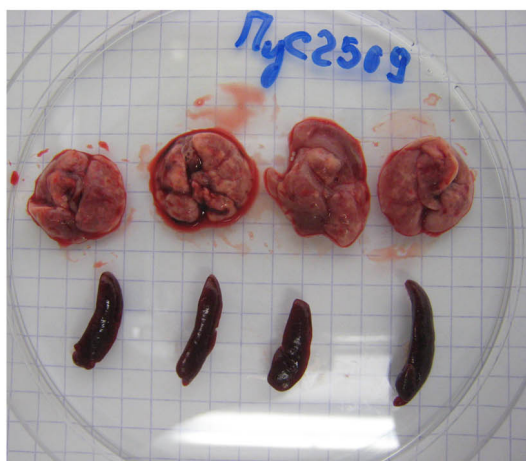

**Supplementary Figure 3:** Lungs and spleens from C57BL/6 mice 6 weeks after aerosol infection with the different *M. tuberculosis* strains, indicated.

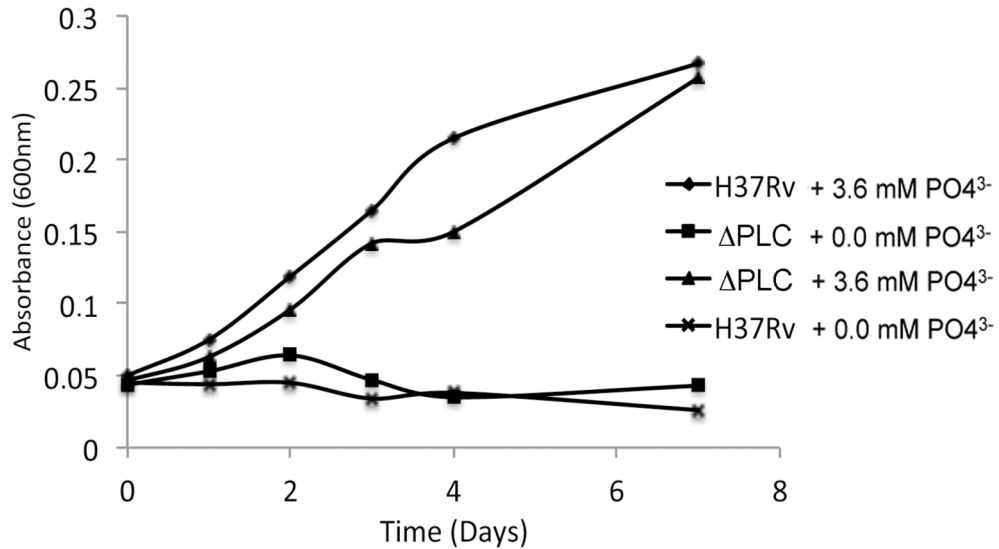

**Supplementary Figure 4:** Growth curve at 37°C of *M. tuberculosis* H37Rv WT and ΔPLC strains in presence or absence of phosphate.

## Supplementary Table 1

**Table n°1** Primers list used in this study

| Name                                                            | Séquence                                                     |
|-----------------------------------------------------------------|--------------------------------------------------------------|
| Construction of <i>M.tuberculosis</i> H37Rv $\Delta$ <i>plc</i> |                                                              |
| <b>1</b> Apra_Swal_Forward                                      | 5'- <u>ATTTAAAT</u> tcatgtgcagctccatcagc-3'                  |
| <b>2</b> Apra_Swal_Reverse                                      | 5'- <u>ATTTAAAT</u> cattgagcgtcagcatatcat-3'                 |
| <b>3</b> Up-region_plcA_Del_Forward                             | 5'-gaatgcaagcaatgggcggac-3'                                  |
| <b>4</b> Up-region_plc_Del_Reverse                              | 5'-tggagctgcacatgaa <u>ATTTAAAT</u> tccgaggagtggccttgcgct-3' |
| <b>5</b> Up-region_plcC_Del_Forward                             | 5'-atgctgacgtcaatg <u>ATTTAAAT</u> ccgggatggttcagacgtaa-3'   |
| <b>6</b> Up-region_plcC_Del_Reverse                             | 5'-atgcggaatcacgctgctgct-3'                                  |
| Screening of <i>M.tuberculosis</i> H37Rv $\Delta$ <i>plc</i>    |                                                              |
| <b>7</b> Apra_Verif_Down                                        | 5'-tcgctgatgatatgctgacg-3'                                   |
| <b>8</b> Apra_Verif_Up                                          | 5'-ctgatggagctgcacatgaa-3'                                   |
| <b>9</b> Verif_H37Rv_Del_Up                                     | 5'-ccgctggccatgcgaaaag-3'                                    |
| <b>10</b> Verif_H37Rv_Del_Down                                  | 5'-tcataaaacgtgttgccatggtg-3'                                |
| Construction of Pr_plc-ATGegfp plasmid                          |                                                              |
| <b>11</b> PlcA_NheI_R                                           | 5'-atcg <u>GCTAGC</u> tgacattccgaggagtgggc-3'                |
| <b>12</b> Pr_plcA_HindIII_EcoRV_F                               | 5'-atcg <u>AAGCTTGATATC</u> gaatgcaagcaatgggcgga-3'          |
